# Supplementary material for: Effects of sn-2 Palmitic Triacylglycerols and the Ratio of OPL to OPO in Human Milk Fat Substitute on Metabolic Regulation in Sprague-Dawley Rats
Source: MDPI journal article supplement (doi:10.3390/nu16091299), 2024-04-26
Supplement: s1 [file s1]

# **Effects of Sn-2 Palmitic Triacylglycerols and the Ratio of OPL to OPO in Human Milk Fat Substitute on Metabolic Regulation in Sprague-Dawley Rats**

Lin Zhu <sup>1</sup>, Shuaizhen Fang <sup>1</sup>, Yaqiong Zhang <sup>1, \*</sup>, Xiangjun Sun <sup>1</sup>, Puyu Yang <sup>1</sup>, Weiying Lu<sup>1</sup>, and Liangli Yu <sup>2</sup>

<sup>1</sup> Institute of Food and Nutraceutical Science, School of Agriculture and Biology,  
Shanghai Jiao Tong University, Shanghai 200240, China

<sup>2</sup> Department of Nutrition and Food Science, University of Maryland, College Park,  
Maryland 20742, United States

\* Corresponding Author:

Yaqiong Zhang, Ph.D. Tel: (86)-21-34204538; Fax: (86)-21-34204538; E-mail:

yqzhang2006@sjtu.edu.cn

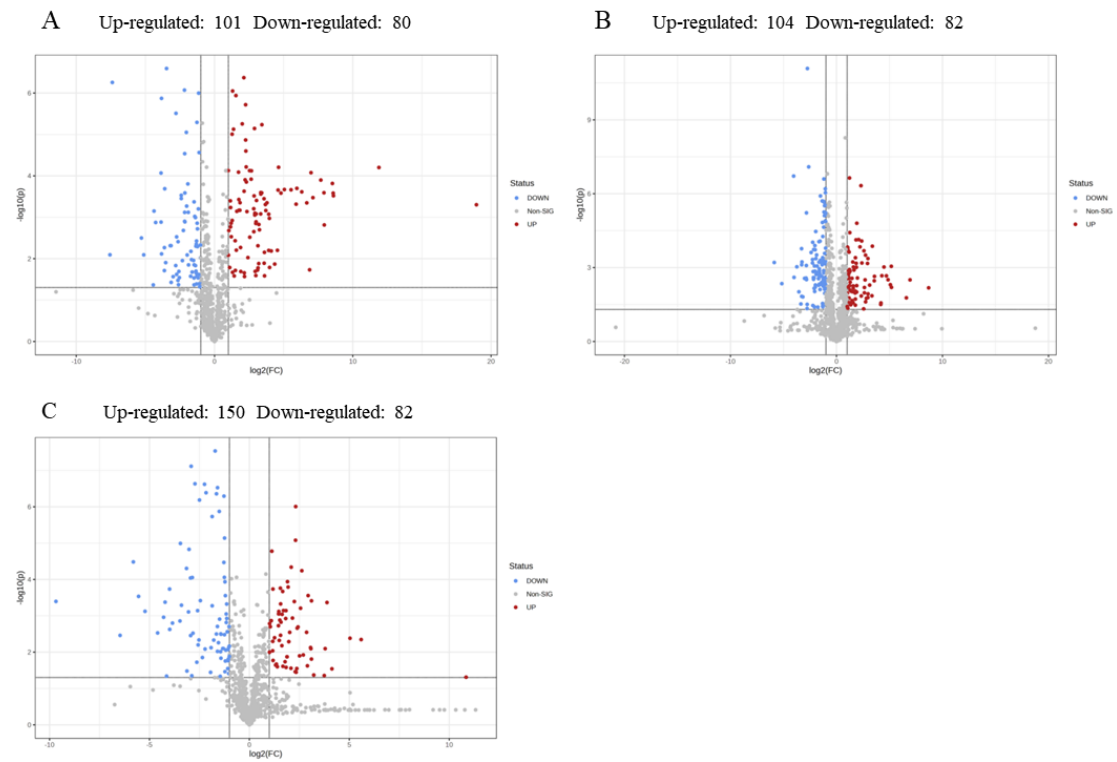

**Figure S1.** Volcano plot analysis of serum metabolites between CF and HMFS1-fed rats (A), HMFS1 and HMFS2-fed rats (B), HMFS1 and HMFS3-fed rats (C).

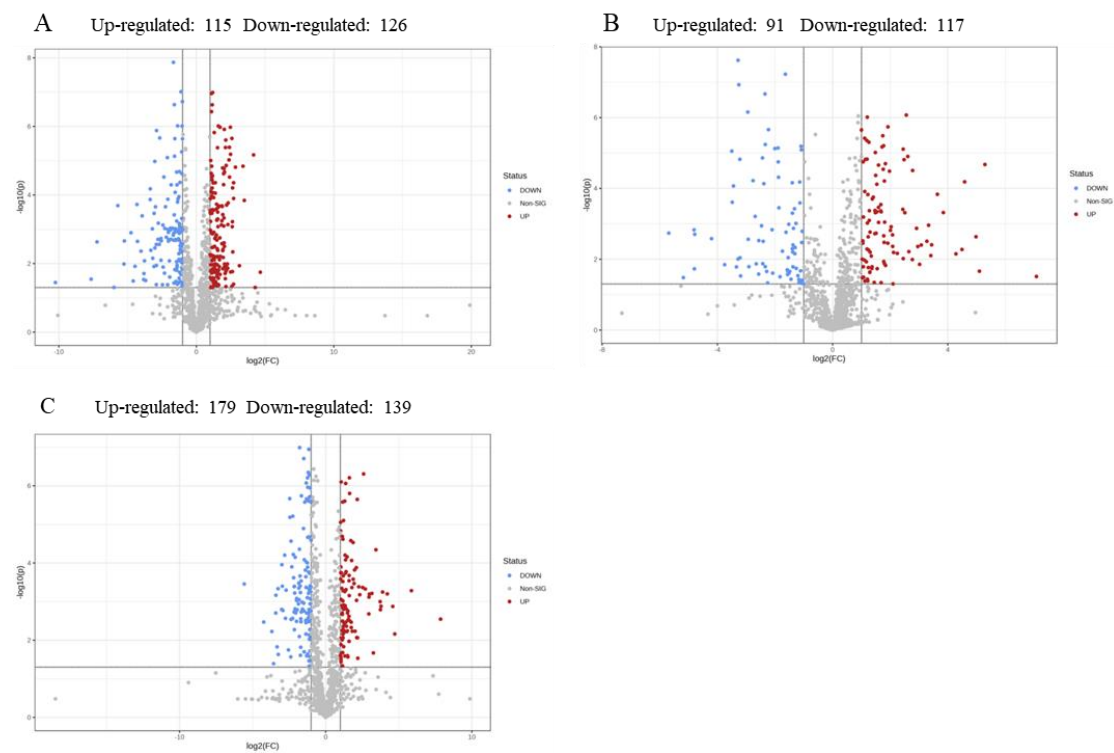

**Figure S2.** Volcano plot analysis of serum lipids between CF and HMFS1-fed rats (A), HMFS1 and HMFS2-fed rats (B), and HMFS1 and HMFS3-fed rats (C).

**Table S1.** Fatty acid composition, *sn*-2 palmitic acid content and OPL to OPO ratio in four experimental fats.

|                                        | CF    | HMFS1 | HMFS2 | HMFS3 |
|----------------------------------------|-------|-------|-------|-------|
| C8:0 (%)                               | 0.52  | 0.32  | 0.41  | 0.28  |
| C10:0 (%)                              | 0.62  | 0.63  | 0.63  | 0.66  |
| C12:0 (%)                              | 3.45  | 1.68  | 2.38  | 2.14  |
| C14:0 (%)                              | 3.09  | 3.23  | 3.18  | 3.39  |
| C16:0 (%)                              | 21.78 | 22.12 | 24.08 | 23.42 |
| C16:1 (%)                              | 0.26  | 0.37  | 0.32  | 0.35  |
| C18:0 (%)                              | 4.70  | 4.57  | 4.67  | 4.82  |
| C18:1 (%)                              | 41.37 | 42.06 | 39.45 | 39.10 |
| C18:2 n-6 (%)                          | 19.23 | 20.36 | 19.75 | 20.81 |
| C18:3 n-3 (%)                          | 3.00  | 2.05  | 2.51  | 2.58  |
| <i>Sn</i> -2 palmitic acid content (%) | 15.54 | 54.36 | 60.02 | 57.87 |
| OPL to OPO ratio                       | 0.4   | 0.3   | 0.9   | 1.4   |

**Table S2.** The detailed diet formulations.

|                     | CF     |       | HMFS1  |       | HMFS2  |       | HMFS3  |       |
|---------------------|--------|-------|--------|-------|--------|-------|--------|-------|
|                     | gm%    | kcal% | gm%    | kcal% | gm%    | kcal% | gm%    | kcal% |
| Protein             | 22.2   | 20.3  | 22.2   | 20.3  | 22.2   | 20.3  | 22.2   | 20.3  |
| Carbohydrate        | 53.3   | 48.8  | 53.3   | 48.8  | 53.3   | 48.8  | 53.3   | 48.8  |
| Fat                 | 15.0   | 30.8  | 15.0   | 30.8  | 15.0   | 30.8  | 15.0   | 30.8  |
| Total               |        | 100   |        | 100   |        | 100   |        | 100   |
| Ingredient          | gm     | kcal  | gm     | kcal  | gm     | kcal  | gm     | kcal  |
| Casein              | 200    | 800   | 200    | 800   | 200    | 800   | 200    | 800   |
| L-Cystine           | 3      | 12    | 3      | 12    | 3      | 12    | 3      | 12    |
| Corn Starch         | 255    | 1020  | 255    | 1020  | 255    | 1020  | 255    | 1020  |
| Maltodextrin 10     | 132    | 528   | 132    | 528   | 132    | 528   | 132    | 528   |
| Sucrose             | 91     | 364   | 91     | 364   | 91     | 364   | 91     | 364   |
| Celluse, BW200      | 50     | 0     | 50     | 0     | 50     | 0     | 50     | 0     |
| Fat Sample CF       | 137    | 1233  |        |       |        |       |        |       |
| Fat Sample HMFS1    |        |       | 137    | 1233  |        |       |        |       |
| Fat Sample HMFS2    |        |       |        |       | 137    | 1233  |        |       |
| Fat Sample HMFS3    |        |       |        |       |        |       | 137    | 1233  |
| t-Butylhydroquinone | 0.0274 | 0     | 0.0274 | 0     | 0.0274 | 0     | 0.0274 | 0     |
| Mineral             | 35     | 0     | 35     | 0     | 35     | 0     | 35     | 0     |
| Vitamin             | 10     | 40    | 10     | 40    | 10     | 40    | 10     | 40    |
| Choline Bitartrate  | 2.5    | 0     | 2.5    | 0     | 2.5    | 0     | 2.5    | 0     |
